# Supplementary material for: Solvent-free synthesis of ZIF-8 from zinc acetate with the assistance of sodium hydroxide
Source: Royal Society of Chemistry journal article supplement (doi:10.1039/d0dt02856h), 2020-01-01
Supplement: d0dt02856h1.pdf [file d0dt02856h1.pdf]

## Electronic Supplementary Information

### Solvent-Free Synthesis of ZIF-8 from Zinc Acetate with the Assistance of Sodium Hydroxide

Peng Ji,<sup>a,b,c</sup> Renbing Tian,<sup>a</sup> Hua Zheng,<sup>a</sup> Jin-gang Jiang,<sup>d</sup> Junbiao Peng<sup>\*,b</sup>  
and Jinghua Sun<sup>\*,a</sup>

<sup>a</sup> School of Electrical Engineering & Intelligentization, Dongguan University of Technology, No. 1 Daxue Road, Dongguan 523808, PR China. E-mail: sunjh@dgut.edu.cn (J. Sun)

<sup>b</sup> State Key Laboratory of Luminescent Materials and Devices, South China University of Technology, No. 381 Wushan Road, Guangzhou 510640, PR China. E-mail: psjbpeng@scut.edu.cn (J. Peng)

<sup>c</sup> Qingdao Haiwan Science and Technology Industry Research Institute Co., Ltd., No. 27 South Banghai Road, Qingdao 266031, PR China.

<sup>d</sup> Shanghai Key Laboratory of Green Chemistry and Chemical Processes, School of Chemistry and Molecular Engineering, East China Normal University, No. 3663 North Zhongshan Road, Shanghai 200062, PR China.

## 1. Experimental Section

### 2.1. Chemicals and material preparation.

Zinc Acetate ( $\text{Zn}(\text{OAc})_2$ , > 99 %), sodium hydroxide ( $\text{NaOH}$ , > 99 %), 2-methylimidazole ( $\text{MeIM}$ , > 98%), methanol (> 98%) were purchased from Tokyo Chemicals Ind (TCI).  $\text{Zn}(\text{NO}_3)_2 \cdot 6\text{H}_2\text{O}$  was purchased (> 99 %) from Sinopharm Chemical Regant Co., Ltd. All the chemicals were used as received without further purification.

In a typical synthesis of ZIF-8-DGUT, 0.183 g of  $\text{Zn}(\text{OAc})_2$  and 0.18 g of  $\text{MeIM}$  ( $\text{MeIM}$  to  $\text{Zn}$  molar ratio of 2.25) were mixed together in an agate mortar with diameter of 6 cm in a dry atmosphere, and fully ground for 5 min. Later, 0.064 g of  $\text{NaOH}$  power was added and fully ground for 10 min. The synthesis was carried out in a 50-mL Teflon-lined stainless-steel autoclave at 343 K for 24 h. The product was washed by suction filtration with water (1.0 to 1.5 mL), and dried overnight in a vacuum-oven at room temperature to obtain ZIF-8-DGUT. The total yield was 97.4% based on  $\text{Zn}(\text{OAc})_2$ .

ZIF-8-ST was prepared according to the literature reported by Lee.<sup>1</sup> In the experiment, 0.67 g (2 mmol) of  $\text{Zn}(\text{NO}_3)_2 \cdot 6\text{H}_2\text{O}$  and 0.167 g (2 mmol) of  $\text{MeIM}$  were mixed in 80 mL of methanol, and the mixture was left at room temperature for 24 h without stirring. The product was washed several times with  $\text{MeOH}$ , centrifuged, and dried overnight in a vacuum-oven at room temperature to obtain ZIF-8-ST.

### 2.2. Physicochemical characterizations.

The X-ray diffraction (XRD) patterns were collected on a Rigaku Ultima IV X-ray diffractometer using  $\text{Cu-K}\alpha$  radiation ( $\lambda = 1.5406 \text{ \AA}$ ) at 35 kV and 25 mA to check the structure and crystallinity of materials. High resolution XRD data for the pawley fits was recorded on a Bruker D8 Advance X-ray diffractometer using  $\text{CuK}\alpha$  radiation (35 kV, 25 mA) with an incident monochromatic X-ray wavelength of  $1.5406 \text{ \AA}$ . To improve accuracy, the sample was continuously rotated in a 0.5 mm glass capillary, and Pawley fits were performed using FULLPROF. To determine the morphology,

scanning electron micrographs (SEM) were collected on a Hitachi S4800 microscope. The nitrogen adsorption isotherms were performed at 77 K on a BELSORP-MAX instrument after activating the samples at room temperature under vacuum for at least 5 h. The Brunauer-Emmett-Teller (BET) analysis was carried out using the data in the relative pressure region of  $P/P_0 = 0.05 - 0.25$ , which provided the specific surface area. The thermogravimetric and differential thermal analyses (TG-DTA) were performed on a METTLER TOLEDO TGA/SDTA 851 apparatus from 298 K to 1073 K at a heating rate of  $10 \text{ K min}^{-1}$  in air. Fourier transform infrared (FT-IR) spectra were collected on a Nicolet Nexus 670 FT-IR spectrometer operated at a spectral resolution of  $2 \text{ cm}^{-1}$  using KBr pellets of the solid samples. The solid state  $^{13}\text{C}$  MAS NMR spectra was obtained on a VARIAN VNMRS-400WB NMR. The X-ray photoelectron spectroscopy (XPS) measurements were carried out by a ThermoFischer ESCALAB 250Xi spectrometer with Al  $K\alpha$  ( $h\nu = 1253.6 \text{ eV}$ ).

### 2.3. Catalytic Characterizations.

The catalytic evaluation of cycloaddition reaction was carried accord to the literature.<sup>2</sup> In a typical reaction, 18 mmol of epichlorohydrin and 100 mg of catalyst were placed in a 250 mL stainless-steel high pressure Parr reactor. The reactor was pressurized with  $\text{CO}_2$  at 7 bar, and the reaction was carried out at 343 - 373 K for 4 h. After the reaction, the reactor was cooled to room temperature, the unreacted  $\text{CO}_2$  was vented out, the catalyst was separated by centrifugation, and the products were analysed by GC/MS (Shimadzu 2014).

### Reference

- (1) Y.-R. Lee, M.-S. Jang, H.-Y. Cho, H.-J. Kwon, S. Kim and W.-S. Ahn, *Chem. Eng. J.*, 2015, **271**, 276-280.
- (2) C. M. Miralda, E. E. Macias, M. Zhu, P. Ratnasamy and M. A. Carreon, *ACS Catal.*, 2012, **2**, 180-183.



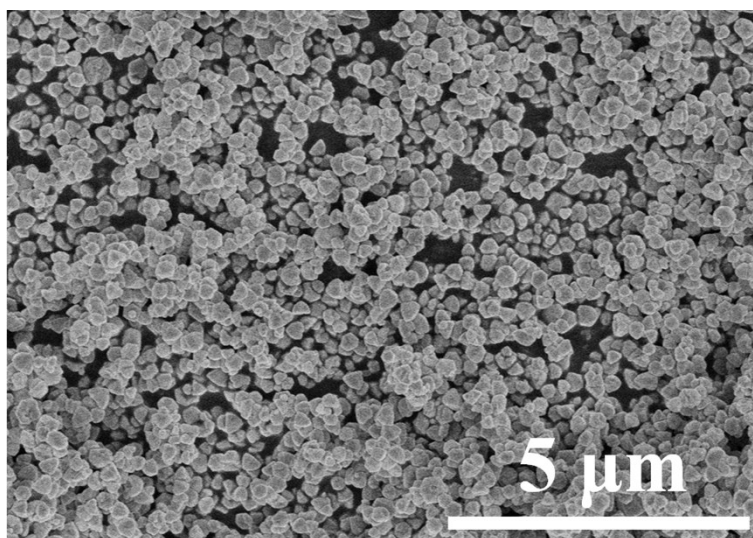

**Fig. S1** SEM image of ZIF-8-ST.

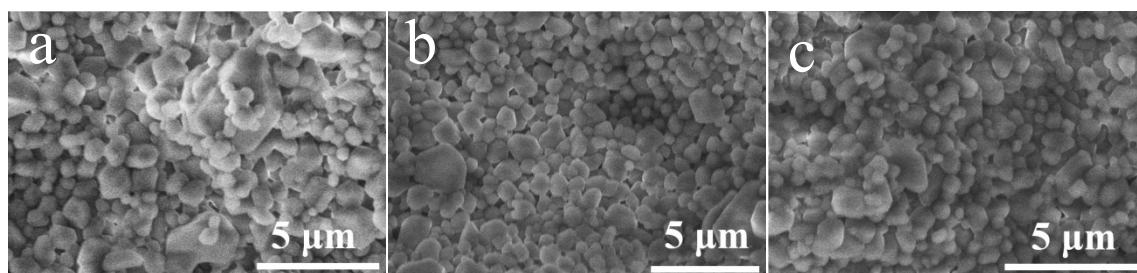

**Fig. S2** SEM images of ZIF-8-DGUT as-synthesized at 323 (a), 373 (b) and 423 (c) K. The synthesis was conducted for 24 h, 4 h and 1 h, respectively.

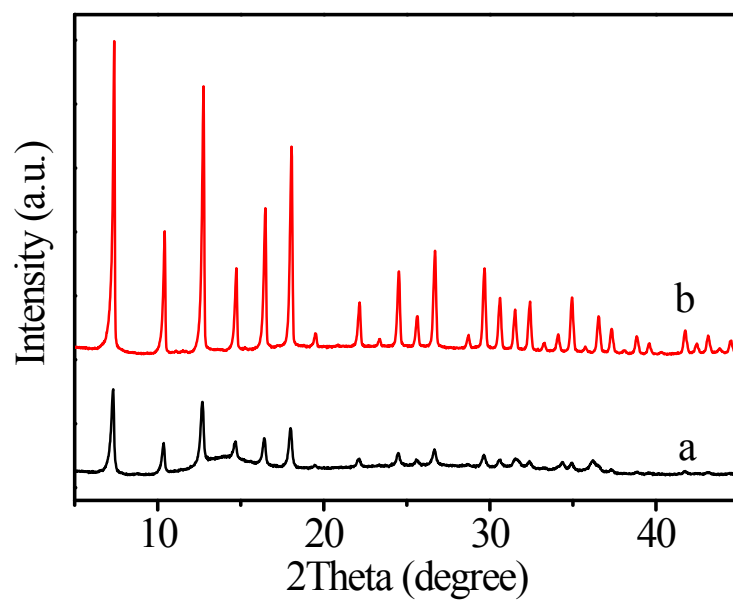

**Fig. S3** XRD patterns of as-synthesized products obtained at 298 (a) and 323 (b) K for 48 h and 24 h, respectively.

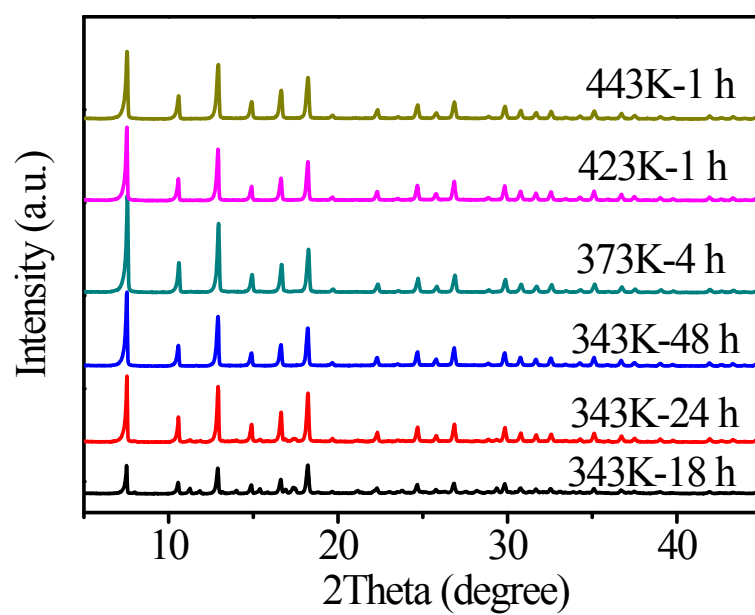

**Fig. S4** XRD patterns of as-synthesized products obtained at different temperature and time.

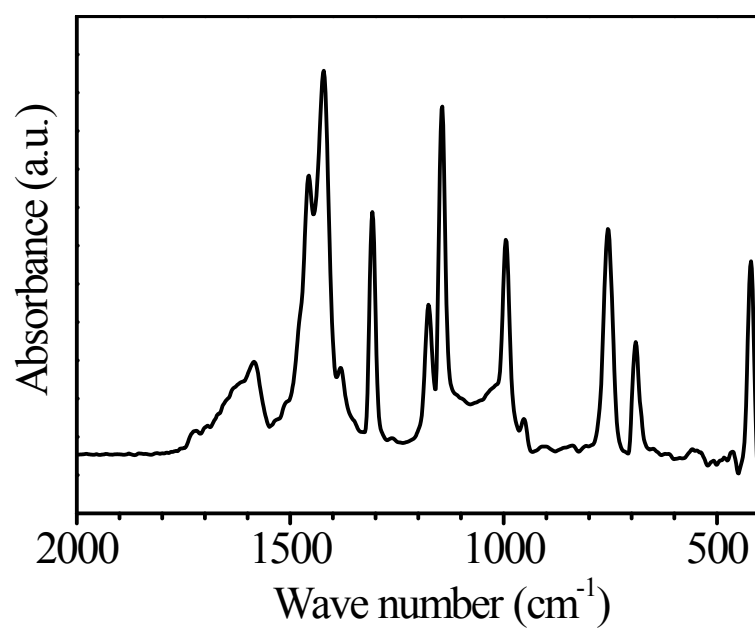

**Fig. S5** FT-IR spectra of ZIF-8-DGUT.

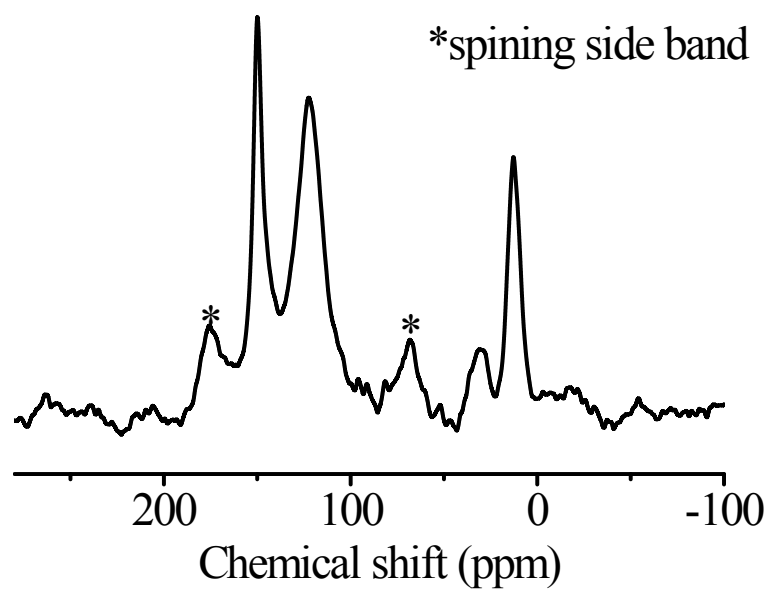

**Fig. S6** Solid state  $^{13}\text{C}$  MAS NMR spectra of ZIF-8-DGUT.

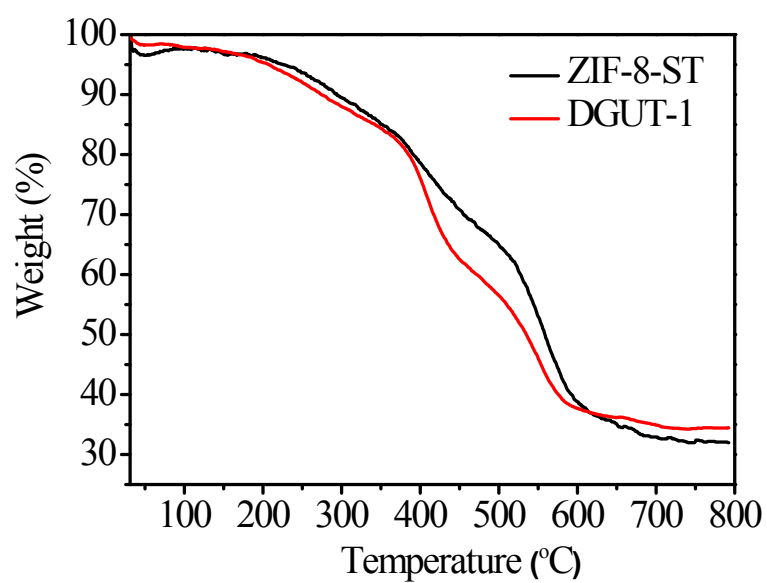

**Fig. S7** Thermogravimetric analyse (TGA) curves of ZIF-8-ST and ZIF-8-DGUT.

**Table S1.** The parameters of powder diffraction data collection for ZIF-8-DGUT.

|                              |                           |
|------------------------------|---------------------------|
| Diffractionmeter             | D8A                       |
| Condition of data collection | Room temperature          |
| Sample holder                | Rotating 0.5 mm capillary |
| Wavelength (Å)               | 1.5406                    |
| 2θ range (degree)            | 5 - 120                   |
| Step size 2θ (degree)        | 0.008135                  |

**Table S2.** Crystallographic data from the Pawley fits of ZIF-8-DGUT.

|                               |                                                  |
|-------------------------------|--------------------------------------------------|
| Unit cell composition         | C <sub>69</sub> N <sub>48</sub> Zn <sub>12</sub> |
| Lattice parameters            |                                                  |
| <i>a</i> [Å]                  | 16.99714(4)                                      |
| <i>b</i> [Å]                  | 16.99714 (4)                                     |
| <i>c</i> [Å]                  | 16.99714 (4)                                     |
| $\alpha = \beta = \gamma$ (°) | 90                                               |
| Space group                   | I-43M(217)                                       |
| Number of points              | 6763                                             |
| Contributing reflections      | 91                                               |
| Peak profile                  | Pseudo-Voigt                                     |
| R <sub>p</sub>                | 0.1548                                           |
| R <sub>wp</sub>               | 0.0685                                           |
| Rwp(w/o bck)                  | 0.0739                                           |

**Table S3.** Catalytic Performance of ZIF-8-ST and ZIF-8-DGUT in the Cycloaddition of CO<sub>2</sub> to Epichlorohydrin

| Catalyst/ Temperature<br>(°C) | Epichlorohydrin<br>conversion (%) | Selectivity (%)            |      |       |
|-------------------------------|-----------------------------------|----------------------------|------|-------|
|                               |                                   | chloropropene<br>carbonate | diol | dimer |
| ZIF-8-ST (70)                 | 64.6                              | 59.6                       | 29.7 | 10.7  |
| ZIF-8-DGUT (70)               | 61.2                              | 54.4                       | 34.8 | 10.8  |
| ZIF-8-ST (80)                 | 77.9                              | 44.7                       | 33.1 | 22.2  |
| ZIF-8-DGUT (80)               | 80.2                              | 48.8                       | 26.9 | 24.3  |
| ZIF-8-ST (90)                 | 85.6                              | 45.2                       | 24.3 | 30.5  |
| ZIF-8-DGUT (90)               | 86.9                              | 47.6                       | 22.5 | 29.9  |
| ZIF-8-ST (100)                | 92.1                              | 41.3                       | 27.6 | 31.1  |
| ZIF-8-DGUT (100)              | 94.2                              | 36.1                       | 32.3 | 31.6  |

Reaction conditions: catalyst, 100 mg; epichlorohydrin, 18 mmol; pressure, 7 bar; time, 4 h.
